# Supplementary material for: Atomistic mechanism of transmembrane helix association
Source: PubMed Central journal article supplement (PMC7272003; doi:10.1371/journal.pcbi.1007919), 2020-06-04
Supplement: pcbi.1007919.s001.pdf [file pcbi.1007919.s001.pdf]

## **S1 Text: Comparison of off rate with steric trap experiments**

The off rate from simulations was estimated to be  $2 \times 10^3 \text{ s}^{-1}$ . However, even with the force field adjustment to stabilize the native state, the dimer is somewhat less stable than in experiment, having  $K_d \approx 10^{-3} \text{ molecules.nm}^{-2}$  ( $\Delta G \approx 4.1 \text{ kcal.mol}^{-1}$ ), compared with the estimate from steric trap experiments of  $K_d \approx 1.3 \times 10^{-9} \text{ molecules.nm}^{-2}$  ( $\Delta G \approx 12.1 \text{ kcal.mol}^{-1}$ ) [1]. If we assume that the on rate  $k_{\text{on}}$  is unaffected by changes in stability, since it is effectively diffusion-limited, then any change of stability or dissociation constant  $K_d = k_{\text{off}}/k_{\text{on}}$  must arise from variations in the off rate  $k_{\text{off}}$ . Thus, since  $K_d$  is  $10^6$  smaller in experiment,  $k_{\text{off}}$  would be expected to be  $10^6$  smaller also, i.e.  $2 \times 10^{-3} \text{ s}^{-1}$ .

## **References**

- [1] Hong H, Blois TM, Cao Z, Bowie JU. Method to measure strong protein-protein interactions in lipid bilayers using a steric trap. Proc Natl Acad Sci USA. 2010 Nov;107(46):19802–19807.
