# Supplementary material for: Atomistic mechanism of transmembrane helix association
Source: PubMed Central journal article supplement (PMC7272003; doi:10.1371/journal.pcbi.1007919), 2020-06-04
Supplement: pcbi.1007919.s002.pdf [file pcbi.1007919.s002.pdf]

S1 Table : Summary of all the transition path sampling simulation executed. Each row in the table corresponds to a forward and backward pair of simulations. The “barrier” refers to the first or second barrier in the PMF, the “initial condition” is that used to initialize the umbrella sampling runs from which the starting structure was chosen, “window” refers to the umbrella window from which that structure was drawn, and “simulation frame” is the frame number in that window corresponding to that structure. The final column lists the end points of the two trajectories, which may be “A” or “B” for finishing in the more native or less native side of the barrier respectively, and “None” if the trajectory did not reach either basin within the maximum simulation time allowed. Path durations listed as 0.0 are those paths which were shorter than the interval between saving frames.

| Barrier | Initial Condition | Fwd basin | Fwd duration<br>(ns) | Rev basin | Rev duration<br>(ns) |
|---------|-------------------|-----------|----------------------|-----------|----------------------|
| 1st     | separate          | B         | 16.3                 | B         | 21.2                 |
| 1st     | separate          | B         | 42.0                 | B         | 877.6                |
| 1st     | separate          | B         | 100.7                | B         | 19.4                 |
| 1st     | separate          | B         | 62.8                 | B         | 30.5                 |
| 1st     | separate          | B         | 73.5                 | B         | 356.3                |
| 1st     | separate          | None      | -                    | A         | 587.3                |
| 1st     | separate          | B         | 296.9                | None      | -                    |
| 1st     | separate          | B         | 129.6                | B         | 115.1                |
| 1st     | separate          | None      | -                    | None      | -                    |
| 1st     | separate          | B         | 13.0                 | B         | 1,176.1              |
| 1st     | separate          | A         | 975.5                | B         | 716.4                |
| 1st     | separate          | B         | 1,301.5              | A         | 627.4                |
| 1st     | separate          | A         | 411.0                | A         | 735.0                |
| 1st     | separate          | B         | 939.8                | B         | 954.3                |
| 1st     | separate          | None      | -                    | B         | 192.4                |
| 1st     | separate          | A         | 612.5                | B         | 237.7                |
| 1st     | separate          | B         | 731.8                | B         | 493.3                |
| 1st     | separate          | B         | 413.1                | B         | 134.1                |
| 1st     | separate          | B         | 290.2                | B         | 637.7                |
| 1st     | separate          | B         | 480.0                | None      | -                    |
| 1st     | separate          | B         | 82.5                 | B         | 193.3                |
| 1st     | separate          | B         | 270.9                | B         | 775.3                |
| 1st     | separate          | None      | -                    | None      | -                    |
| 1st     | separate          | B         | 207.8                | B         | 401.5                |
| 1st     | separate          | None      | -                    | B         | 117.2                |
| 1st     | separate          | None      | -                    | B         | 540.8                |
| 1st     | separate          | B         | 647.5                | B         | 113.5                |
| 1st     | separate          | B         | 91.0                 | B         | 13.8                 |
| 1st     | separate          | None      | -                    | B         | 129.0                |
| 1st     | separate          | B         | 181.2                | B         | 336.0                |

Continued on next page

**S1 Table – continued from previous page**

| Barrier | Initial Condition | Fwd basin | Fwd duration<br>(ns) | Rev basin | Rev duration<br>(ns) |
|---------|-------------------|-----------|----------------------|-----------|----------------------|
| 1st     | separate          | B         | 67.3                 | B         | 39.9                 |
| 1st     | separate          | B         | 604.8                | None      | -                    |
| 1st     | separate          | B         | 1,031.3              | None      | -                    |
| 1st     | separate          | B         | 758.3                | B         | 929.0                |
| 1st     | separate          | B         | 282.7                | None      | -                    |
| 1st     | separate          | B         | 216.2                | A         | 1,059.9              |
| 1st     | native            | B         | 755.2                | B         | 718.0                |
| 1st     | native            | B         | 444.8                | B         | 756.0                |
| 1st     | native            | None      | -                    | None      | -                    |
| 1st     | native            | None      | -                    | None      | -                    |
| 1st     | native            | B         | 816.2                | B         | 981.9                |
| 1st     | native            | None      | -                    | B         | 120.2                |
| 1st     | native            | B         | 636.1                | B         | 173.0                |
| 1st     | native            | A         | 865.6                | None      | -                    |
| 1st     | native            | B         | 191.5                | B         | 89.4                 |
| 1st     | native            | B         | 230.4                | B         | 47.0                 |
| 1st     | native            | B         | 437.9                | B         | 96.6                 |
| 1st     | native            | None      | -                    | None      | -                    |
| 1st     | native            | B         | 403.0                | B         | 418.9                |
| 1st     | native            | A         | 168.3                | B         | 308.6                |
| 1st     | native            | B         | 740.5                | B         | 185.2                |
| 1st     | native            | None      | -                    | A         | 293.1                |
| 1st     | native            | B         | 169.3                | None      | -                    |
| 1st     | native            | None      | -                    | None      | -                    |
| 1st     | native            | B         | 203.2                | None      | -                    |
| 1st     | native            | B         | 136.7                | A         | 227.0                |
| 1st     | native            | A         | 127.9                | B         | 311.6                |
| 1st     | native            | None      | -                    | B         | 556.8                |
| 1st     | native            | B         | 449.0                | B         | 77.3                 |
| 1st     | native            | B         | 263.7                | B         | 443.8                |
| 1st     | native            | B         | 442.7                | None      | -                    |
| 1st     | native            | None      | -                    | B         | 229.8                |
| 1st     | native            | B         | 150.9                | B         | 40.7                 |
| 1st     | native            | B         | 552.5                | B         | 329.5                |
| 1st     | native            | B         | 1,255.0              | A         | 664.7                |
| 1st     | native            | B         | 359.1                | B         | 556.5                |
| 1st     | native            | None      | -                    | None      | -                    |
| 1st     | native            | B         | 21.4                 | B         | 11.4                 |
| 1st     | native            | None      | -                    | None      | -                    |
| 1st     | native            | B         | 186.8                | B         | 175.7                |
| 1st     | native            | B         | 267.1                | None      | -                    |
| 1st     | native            | A         | 270.5                | B         | 107.3                |

Continued on next page

**S1 Table – continued from previous page**

| Barrier | Initial Condition | Fwd basin | Fwd duration<br>(ns) | Rev basin | Rev duration<br>(ns) |
|---------|-------------------|-----------|----------------------|-----------|----------------------|
| 1st     | native            | None      | -                    | B         | 135.7                |
| 1st     | native            | B         | 315.4                | B         | 180.3                |
| 1st     | native            | A         | 1,178.4              | B         | 308.5                |
| 2nd     | separate          | A         | 0.0                  | A         | 0.1                  |
| 2nd     | separate          | A         | 0.3                  | A         | 33.2                 |
| 2nd     | separate          | A         | 1.3                  | A         | 12.7                 |
| 2nd     | separate          | A         | 0.6                  | A         | 0.2                  |
| 2nd     | separate          | A         | 0.1                  | A         | 0.8                  |
| 2nd     | separate          | A         | 2.0                  | B         | 3.2                  |
| 2nd     | separate          | B         | 37.4                 | A         | 0.1                  |
| 2nd     | separate          | A         | 8.0                  | A         | 0.1                  |
| 2nd     | separate          | A         | 6.6                  | B         | 30.8                 |
| 2nd     | separate          | A         | 0.8                  | A         | 5.7                  |
| 2nd     | separate          | B         | 5.3                  | A         | 9.7                  |
| 2nd     | separate          | B         | 10.6                 | A         | 15.4                 |
| 2nd     | separate          | A         | 11.2                 | B         | 57.5                 |
| 2nd     | separate          | None      | -                    | A         | 0.6                  |
| 2nd     | separate          | B         | 42.5                 | B         | 10.6                 |
| 2nd     | separate          | B         | 6.5                  | B         | 45.7                 |
| 2nd     | separate          | B         | 3.1                  | A         | 123.4                |
| 2nd     | separate          | A         | 0.2                  | A         | 0.0                  |
| 2nd     | separate          | B         | 4.8                  | B         | 36.9                 |
| 2nd     | separate          | B         | 9.5                  | A         | 8.9                  |
| 2nd     | separate          | A         | 0.0                  | A         | 0.9                  |
| 2nd     | separate          | B         | 11.8                 | A         | 6.0                  |
| 2nd     | separate          | A         | 0.1                  | A         | 0.0                  |
| 2nd     | separate          | A         | 3.0                  | A         | 3.3                  |
| 2nd     | separate          | A         | 0.1                  | A         | 2.8                  |
| 2nd     | separate          | A         | 2.8                  | A         | 2.5                  |
| 2nd     | separate          | A         | 0.1                  | A         | 0.7                  |
| 2nd     | separate          | B         | 118.7                | B         | 94.3                 |
| 2nd     | separate          | A         | 11.3                 | B         | 35.7                 |
| 2nd     | separate          | A         | 0.1                  | A         | 2.7                  |
| 2nd     | separate          | A         | 4.4                  | A         | 4.6                  |
| 2nd     | separate          | A         | 1.1                  | A         | 0.2                  |
| 2nd     | separate          | A         | 26.6                 | A         | 1.7                  |
| 2nd     | separate          | A         | 0.0                  | A         | 0.1                  |
| 2nd     | separate          | A         | 2.3                  | A         | 11.0                 |
| 2nd     | separate          | A         | 6.4                  | A         | 2.0                  |
| 2nd     | separate          | A         | 0.5                  | A         | 3.3                  |
| 2nd     | separate          | A         | 3.3                  | A         | 1.7                  |
| 2nd     | separate          | A         | 0.2                  | A         | 1.0                  |

Continued on next page

**S1 Table – continued from previous page**

| Barrier | Initial Condition | Fwd basin | Fwd duration<br>(ns) | Rev basin | Rev duration<br>(ns) |
|---------|-------------------|-----------|----------------------|-----------|----------------------|
| 2nd     | separate          | A         | 1.3                  | A         | 2.7                  |
| 2nd     | separate          | A         | 0.0                  | A         | 0.2                  |
| 2nd     | separate          | A         | 13.1                 | B         | 7.4                  |
| 2nd     | separate          | A         | 0.5                  | B         | 4.0                  |
| 2nd     | separate          | A         | 0.1                  | A         | 0.2                  |
| 2nd     | separate          | B         | 6.3                  | A         | 0.8                  |
| 2nd     | separate          | A         | 0.9                  | A         | 9.1                  |
| 2nd     | separate          | A         | 0.1                  | B         | 44.6                 |
| 2nd     | separate          | A         | 0.3                  | A         | 0.2                  |
| 2nd     | separate          | A         | 0.3                  | A         | 0.7                  |
| 2nd     | native            | A         | 40.6                 | A         | 109.5                |
| 2nd     | native            | A         | 21.8                 | B         | 54.1                 |
| 2nd     | native            | B         | 19.4                 | A         | 16.0                 |
| 2nd     | native            | B         | 65.5                 | A         | 0.2                  |
| 2nd     | native            | A         | 0.2                  | A         | 0.2                  |
| 2nd     | native            | A         | 3.4                  | A         | 9.2                  |
| 2nd     | native            | A         | 7.6                  | A         | 4.1                  |
| 2nd     | native            | A         | 97.2                 | B         | 100.9                |
| 2nd     | native            | A         | 1.4                  | A         | 3.0                  |
| 2nd     | native            | A         | 7.9                  | A         | 18.7                 |
| 2nd     | native            | A         | 16.9                 | B         | 132.2                |
| 2nd     | native            | A         | 4.7                  | A         | 6.8                  |
| 2nd     | native            | A         | 26.5                 | A         | 56.7                 |
| 2nd     | native            | A         | 141.0                | A         | 42.0                 |
| 2nd     | native            | B         | 66.4                 | A         | 8.0                  |
| 2nd     | native            | A         | 2.9                  | A         | 0.2                  |
| 2nd     | native            | A         | 127.0                | A         | 45.9                 |
| 2nd     | native            | A         | 168.7                | A         | 115.5                |
| 2nd     | native            | B         | 103.0                | A         | 19.5                 |
| 2nd     | native            | A         | 0.2                  | A         | 1.5                  |
| 2nd     | native            | A         | 0.4                  | A         | 0.4                  |
| 2nd     | native            | A         | 0.9                  | A         | 2.2                  |
| 2nd     | native            | A         | 0.3                  | A         | 0.4                  |
| 2nd     | native            | B         | 0.4                  | A         | 0.0                  |
| 2nd     | native            | B         | 60.1                 | A         | 0.0                  |
| 2nd     | native            | A         | 104.7                | A         | 132.4                |
| 2nd     | native            | B         | 15.0                 | B         | 22.4                 |
| 2nd     | native            | B         | 19.7                 | A         | 3.4                  |
| 2nd     | native            | A         | 7.9                  | A         | 1.5                  |
| 2nd     | native            | A         | 0.0                  | A         | 0.0                  |
| 2nd     | native            | A         | 0.5                  | A         | 4.2                  |
| 2nd     | native            | A         | 0.0                  | A         | 0.1                  |

Continued on next page

**S1 Table – continued from previous page**

| Barrier | Initial Condition | Fwd basin | Fwd duration<br>(ns) | Rev basin | Rev duration<br>(ns) |
|---------|-------------------|-----------|----------------------|-----------|----------------------|
| 2nd     | native            | A         | 0.0                  | A         | 0.0                  |
| 2nd     | native            | A         | 0.0                  | A         | 0.0                  |
| 2nd     | native            | A         | 7.4                  | A         | 0.7                  |
| 2nd     | native            | A         | 1.1                  | A         | 1.4                  |
| 2nd     | native            | A         | 80.6                 | None      | -                    |
| 2nd     | native            | A         | 0.1                  | A         | 0.5                  |
| 2nd     | native            | B         | 62.3                 | B         | 30.3                 |
| 2nd     | native            | B         | 2.7                  | B         | 3.2                  |
| 2nd     | native            | A         | 44.4                 | A         | 9.4                  |
| 2nd     | native            | None      | -                    | A         | 4.7                  |
| 2nd     | native            | A         | 7.0                  | B         | 16.2                 |
| 2nd     | native            | B         | 4.5                  | B         | 2.1                  |
| 2nd     | native            | A         | 107.1                | None      | -                    |
